# Supplementary material
Source: MDPI journal article supplement (https://www.mdpi.com/2073-4344/9/8/662)
Supplement: s1 [file s1]

# **Supplemental Information: Salt-Templated Platinum-Copper Porous Macrobeams for Ethanol Oxidation**

F. John Burpo, Enoch A. Nagelli, Anchor R. Losch, Jack K. Bui, Gregory T. Forcherio, David R. Baker, Joshua P. McClure, Stephen F. Bartolucci, and Deryn D. Chu

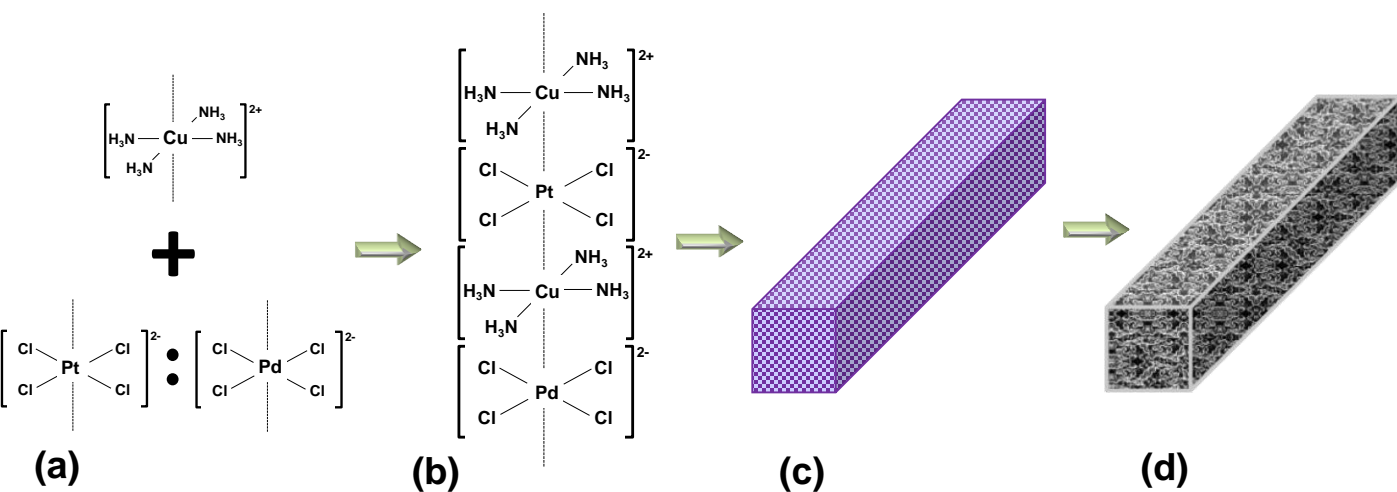

**Figure S1. Macrobeam synthesis scheme.** (a) Addition of  $[\text{PtCl}_4]^{2-}$  and  $[\text{PdCl}_4]^{2-}$  with  $[\text{Cu}(\text{NH}_3)_4]^{2+}$ . (b) Linear stacking of platinum and copper square planar complex ions. (c) Formation of Magnus's salt crystal derivatives. (d) Reduction of platinum/palladium-copper salt needle template to square cross-section macrobeam.

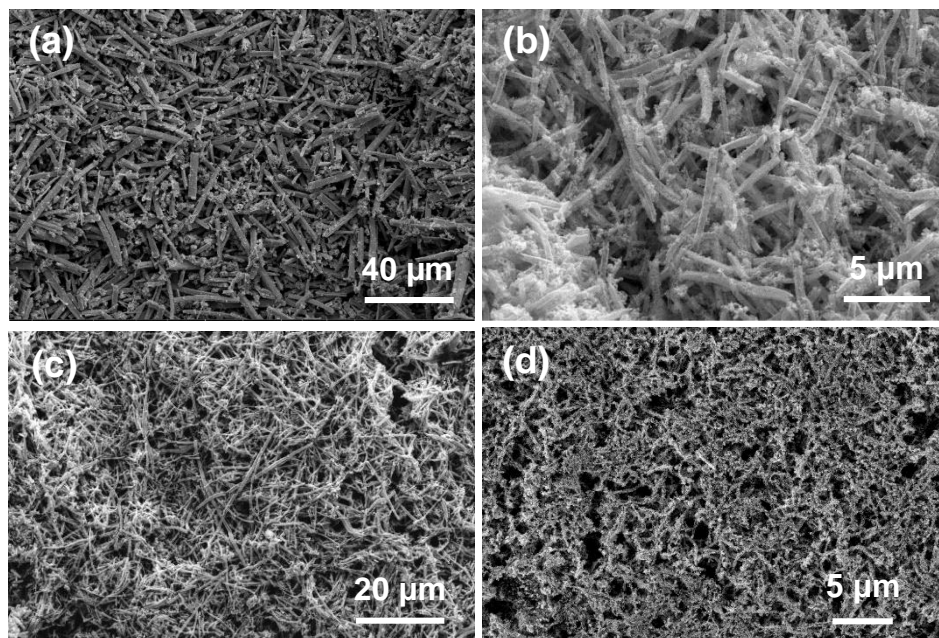

**Figure S2.** Scanning electron microscope images of copper-platinum macrotube structures from DMAB reduced salts with  $\text{Pt}^{2-}:\text{Pt}^{2+}:\text{Cu}^{2+}$  ratios of (a) 1:0:1, (b) 3:1:2, (c) 2:1:1, and (d) 1:1:0.

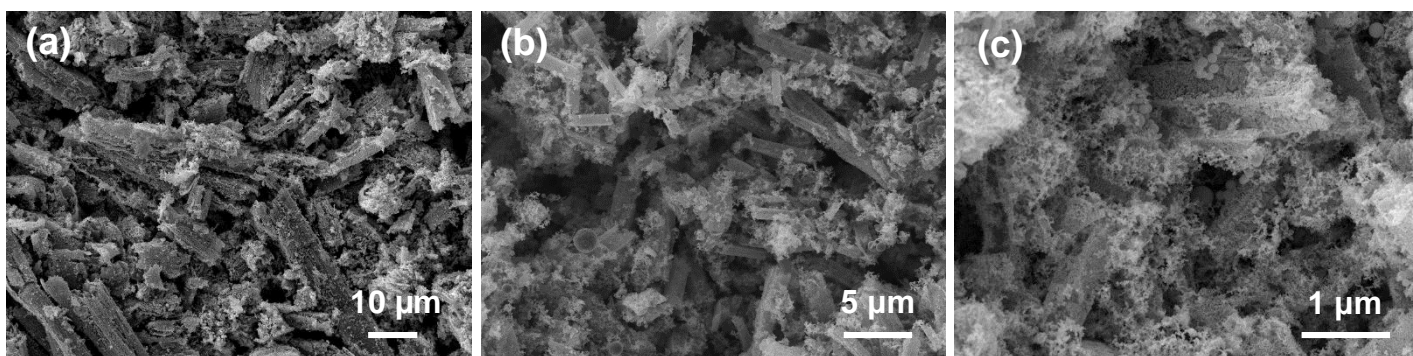

**Figure S3.** Scanning electron microscope images of copper-platinum macrobeam structures from  $\text{NaBH}_4$  reduced salts with  $\text{Pt}^{2-}:\text{Pt}^{2+}:\text{Cu}^{2+}$  ratios of (a) 1:0:1, (b) 3:1:2, and (c) 2:1:1.

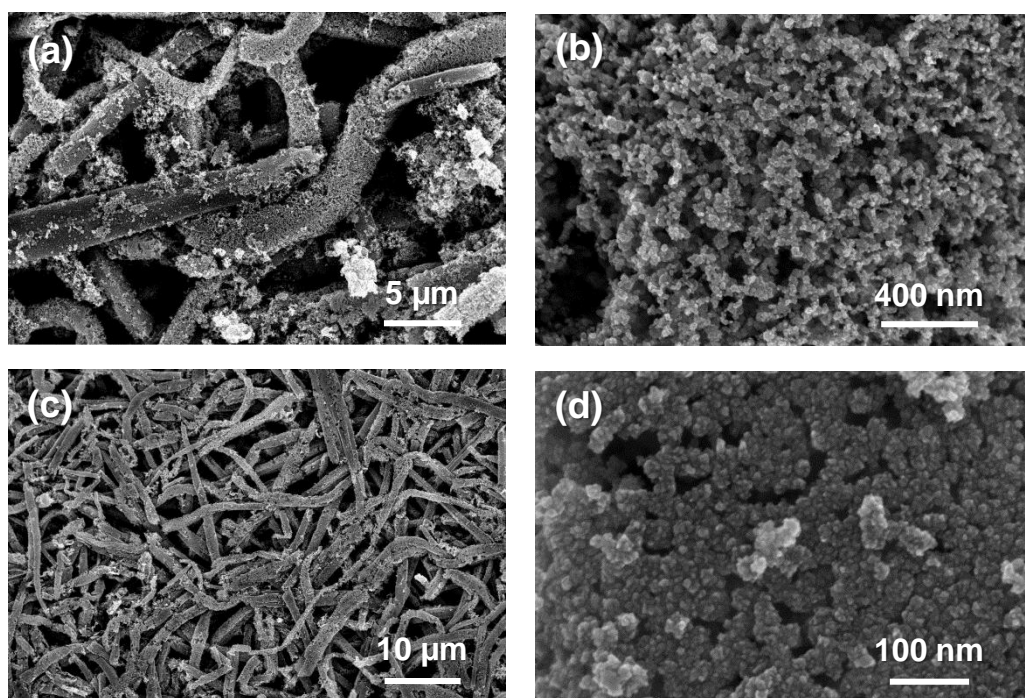

**Figure S4.** Scanning electron microscope images of platinum-copper macrobeams from DMAB reduced salts with  $\text{Pt}^{2+}:\text{Pd}^{2+}:\text{Cu}^{2+}$  ratios of (a,b) 2:1:1, and (c,d) 3:1:2.

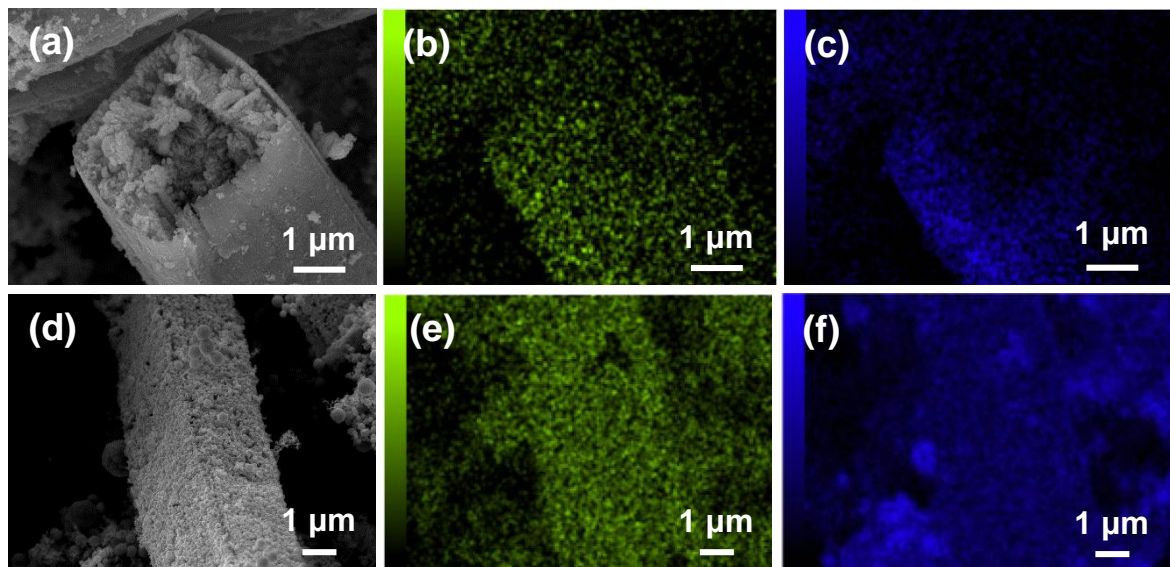

**Figure S5.** Energy dispersive X-ray spectroscopy mapping of platinum-copper macrobeams from salts with a  $\text{Pt}^{2-}:\text{Pt}^{2+}:\text{Cu}^{2+}$  ratio of 1:0:1 reduced with (a–c) DMAB and (d–f)  $\text{NaBH}_4$ . (b,e) Cu-K line (green), and (c,f) Pt-M line (blue) mapped.

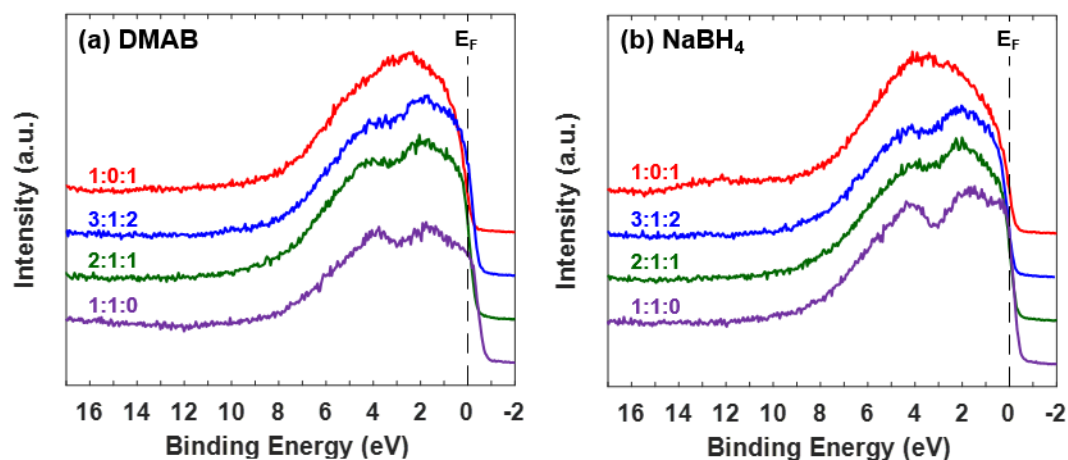

**Figure S6.** X-ray photoelectron spectra (XPS) valence-band spectra (VBS) of the Pt–Cu macrobeams from (a) DMAB, and (b) NaBH<sub>4</sub> reduced salts with Pt<sup>2+</sup>:Pt<sup>2+</sup>:Cu<sup>2+</sup> ratios of 1:0:1, 3:1:2, 2:1:1, and 1:1:0.

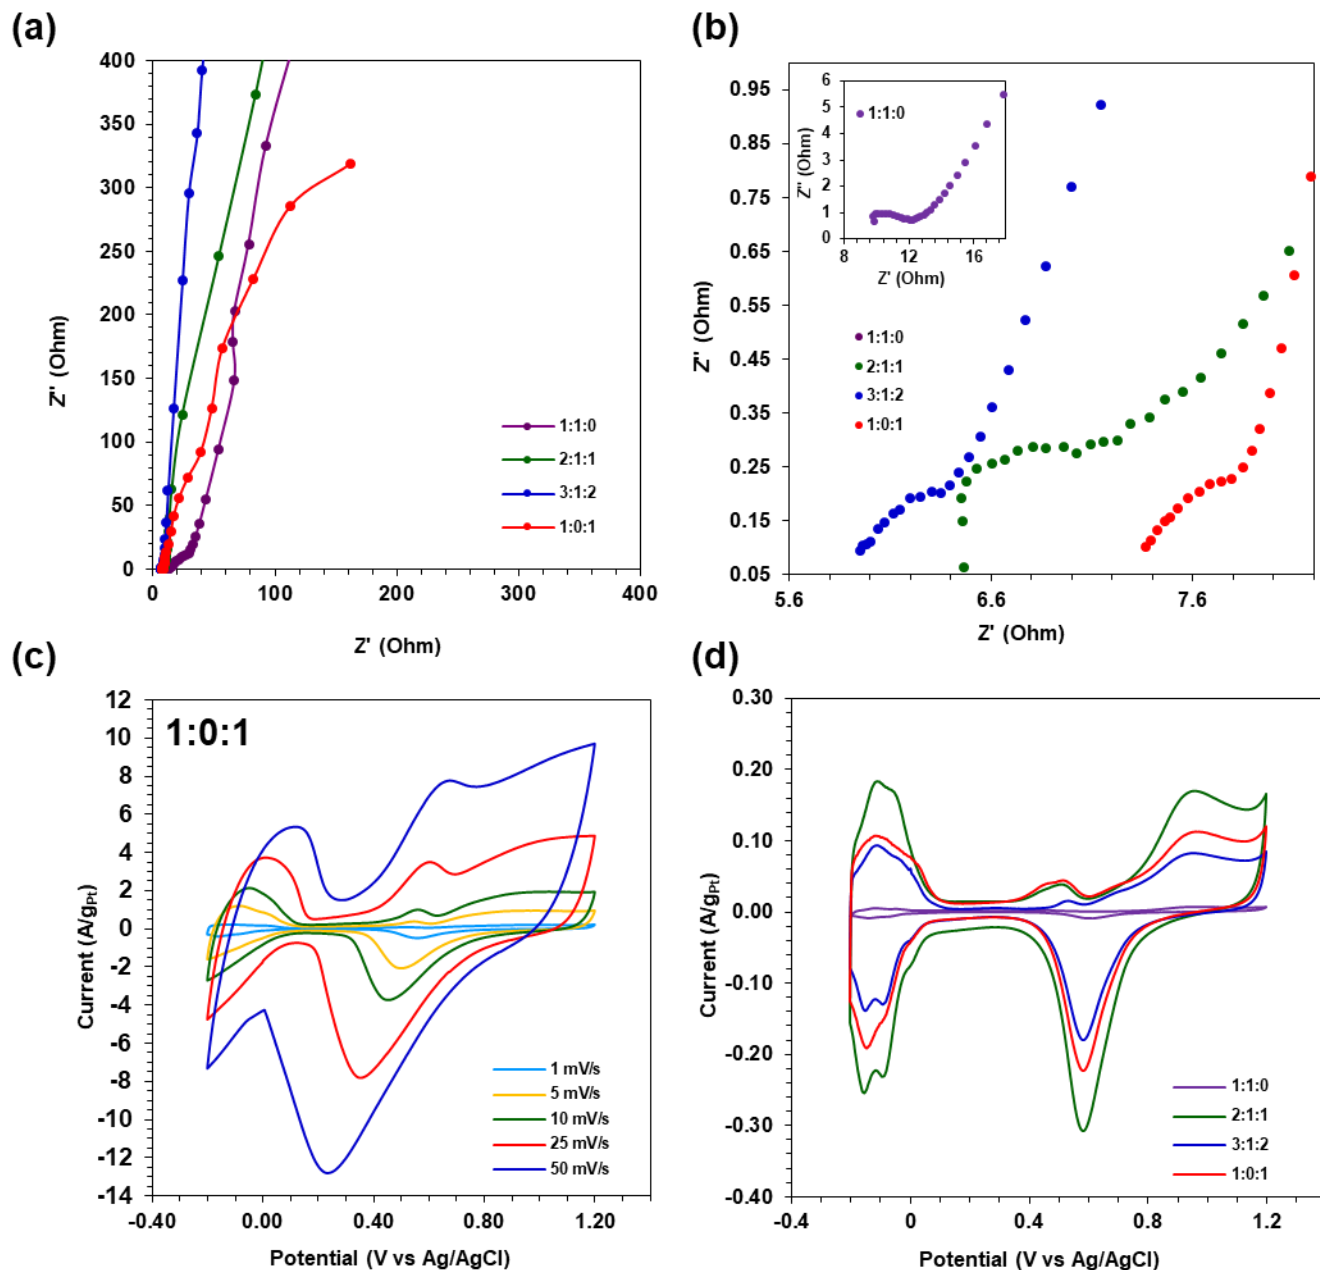

**Figure S7.** Electrochemical characterization of Pt-Cu macrobeams from Pt<sup>2+</sup>:Pt<sup>2+</sup>:Cu<sup>2+</sup> salts reduced with NaBH<sub>4</sub>. **(a)** Electrochemical impedance spectroscopy (EIS) in 0.5 M H<sub>2</sub>SO<sub>4</sub> at frequency range of 1MHz to 1mHz. **(b)** High frequency EIS from (a); (inset) EIS spectrum for 1:1:0. **(c)** Cyclic voltammetry (CV) in 0.5 M H<sub>2</sub>SO<sub>4</sub> for Pt-Cu macrobeams from a 1:0:1 Pt<sup>2+</sup>:Pt<sup>2+</sup>:Cu<sup>2+</sup> salt ratio, in 0.5 M H<sub>2</sub>SO<sub>4</sub> for scan rates of 1, 5, 10, 25, and 50 mV/s. **(d)** CV in 0.5 M H<sub>2</sub>SO<sub>4</sub> and 0.5 mV/s scan rate for macrobeams with Pt<sup>2+</sup>:Pt<sup>2+</sup>:Cu<sup>2+</sup> salt ratios of 1:1:0, 2:1:1, 3:1:2, and 1:0:1.

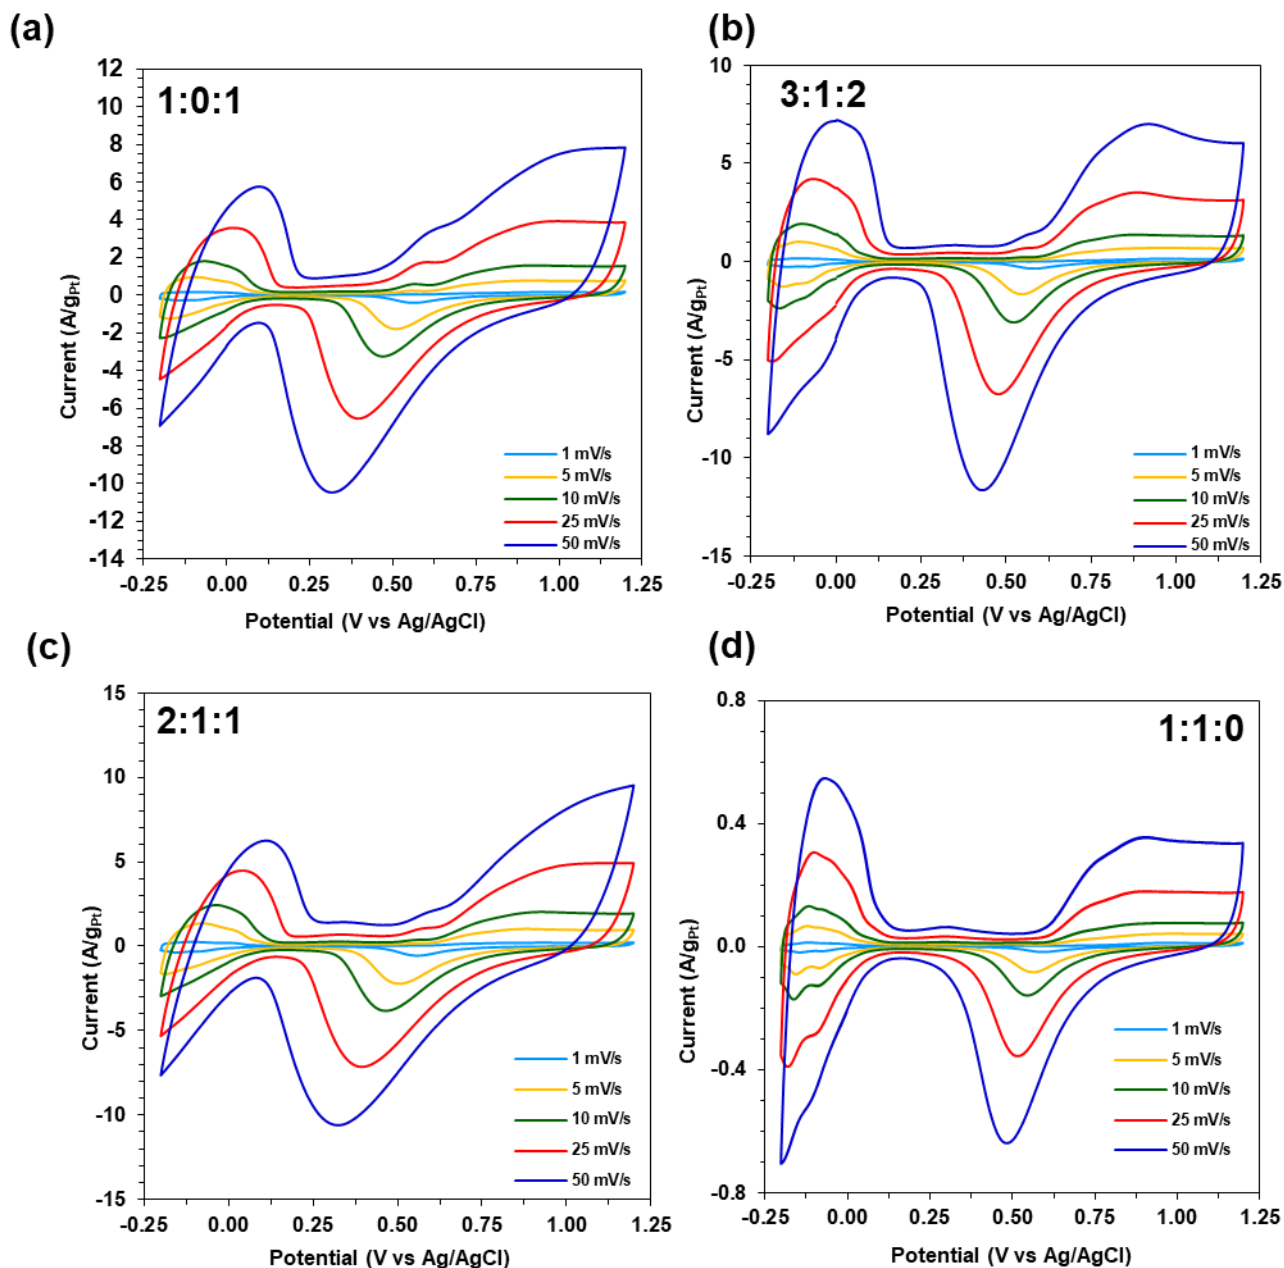

**Figure S8.** Cyclic voltammetry (CV) curves of platinum-copper macrobeams from DMAB reduced salts with  $\text{Pt}^{2+}:\text{Pt}^{2+}:\text{Cu}^{2+}$  ratios of (a) 1:0:1, (b) 3:1:2, (c) 2:1:1, and (d) 1:1:0 in 0.5 M  $\text{H}_2\text{SO}_4$  at scan rates of 1, 5, 10, 25, and 50 mV/s.

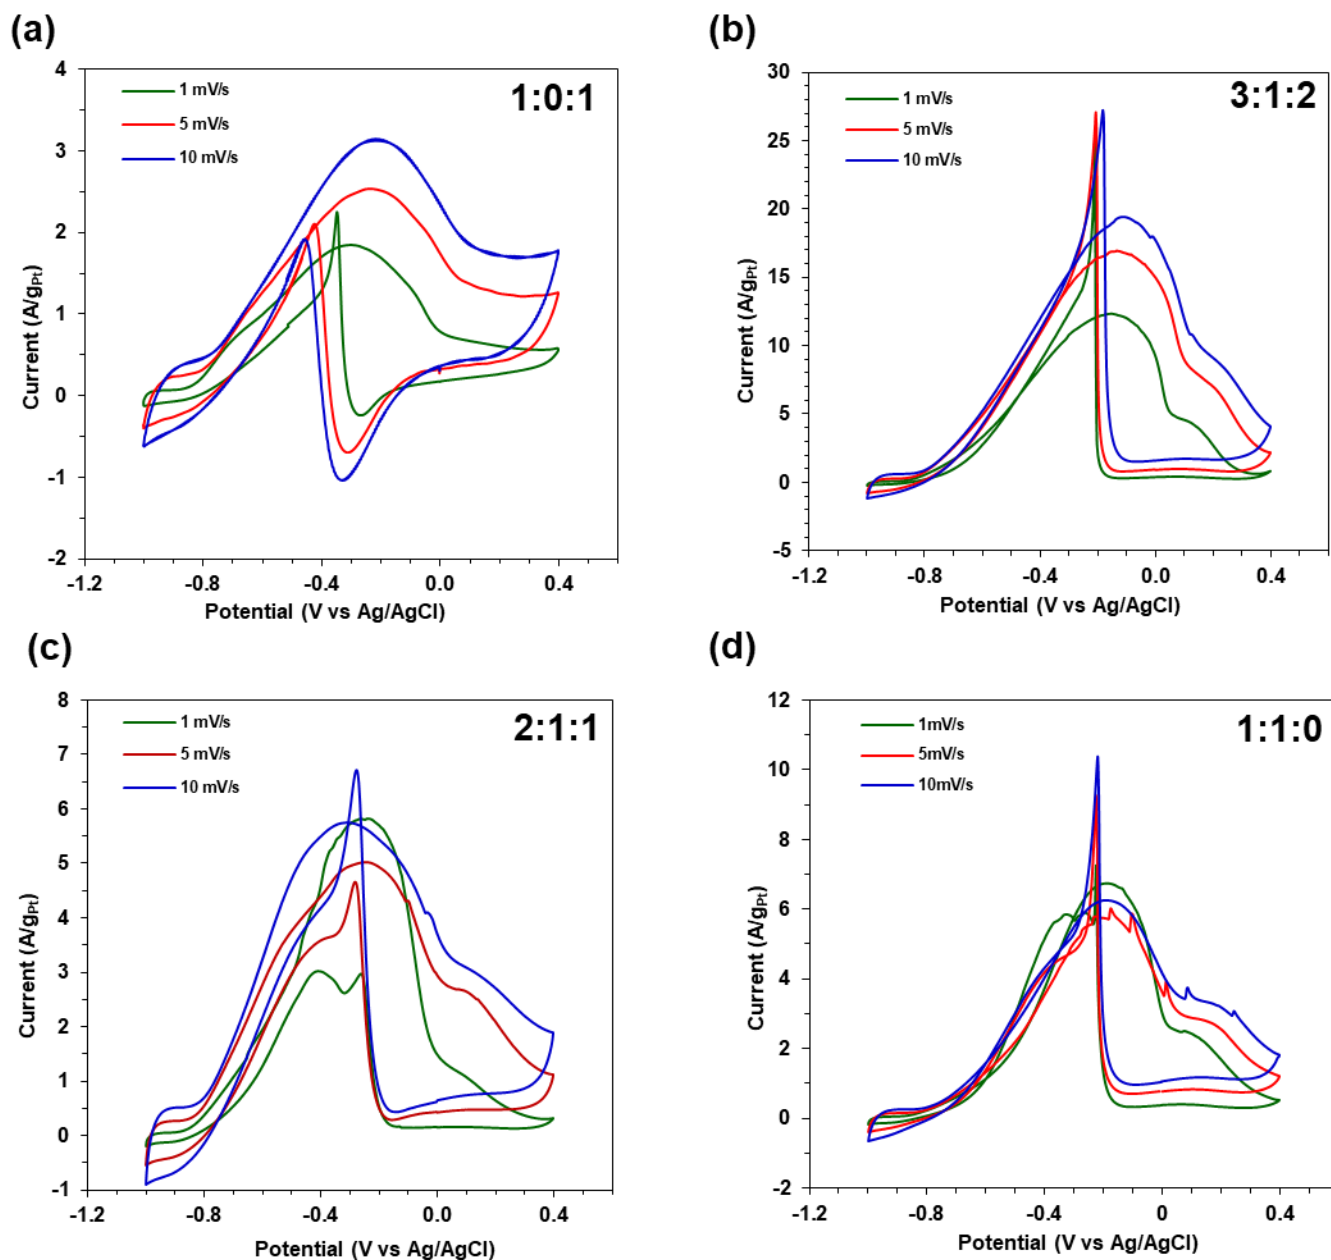

**Figure S9.** Cyclic voltammetry (CV) curves of platinum-copper macrobeams from DMAB reduced salts with  $\text{Pt}^{2+}:\text{Pt}^{2+}:\text{Cu}^{2+}$  ratios of (a) 1:0:1, (b) 3:1:2, (c) 2:1:1, and (d) 1:1:0 in 1 M KOH and 1 M ethanol at scan rates of 1, 5, and 10 mV/s.

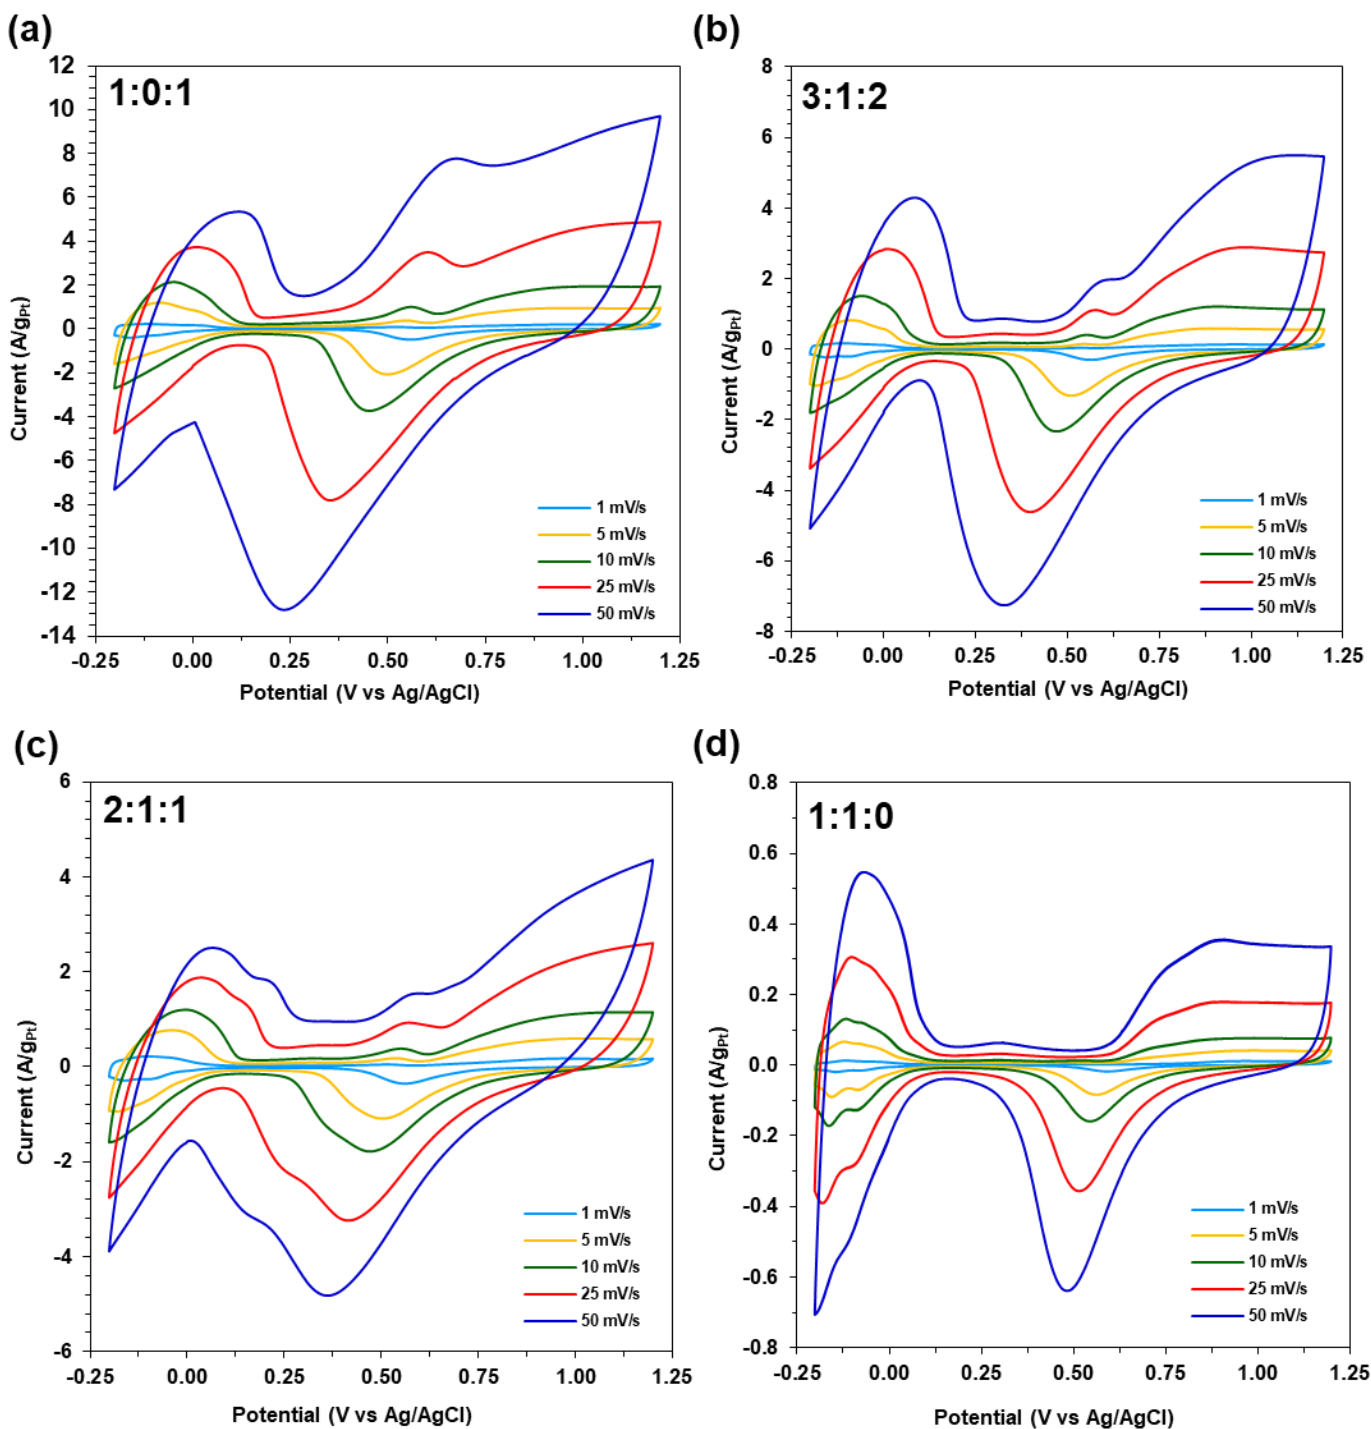

**Figure S10.** Cyclic voltammetry (CV) curves of platinum-copper macrobeams from NaBH<sub>4</sub> reduced salts with Pt<sup>2+</sup>:Pt<sup>2+</sup>:Cu<sup>2+</sup> ratios of (a) 1:0:1, (b) 3:1:2, (c) 2:1:1, and (d) 1:1:0 in 0.5 M H<sub>2</sub>SO<sub>4</sub> at scan rates of 1, 5, 10, 25, and 50 mV/s.

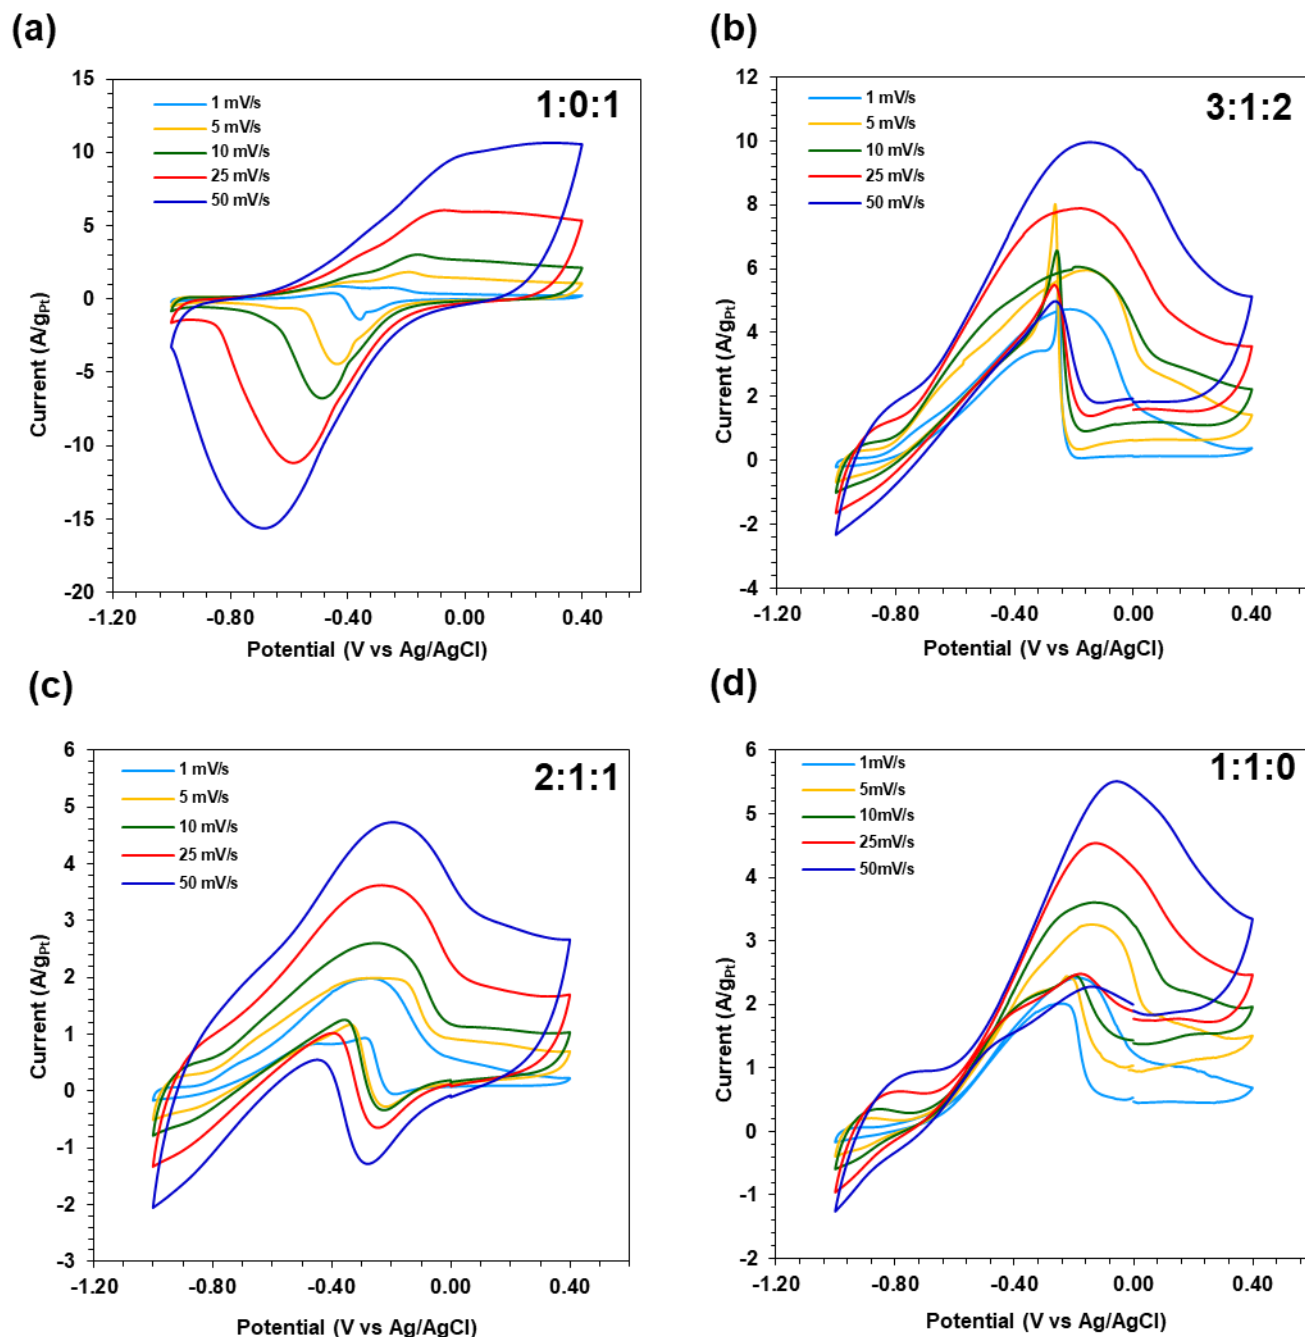

**Figure S11.** Cyclic voltammetry (CV) curves of platinum-copper macrobeams from  $\text{NaBH}_4$  reduced salts with  $\text{Pt}^{2+}:\text{Pt}^{2+}:\text{Cu}^{2+}$  ratios of (a) 1:0:1, (b) 3:1:2, (c) 2:1:1, and (d) 1:1:0 in 1 M KOH and 1 M ethanol at scan rates of 1, 5, 10, 25, and 50 mV/s.
